# Supplementary material
Source: Springer Nature journal article supplement (https://www.springermedizin.de/resource/supplementary/12936_2014_3633_MOESM1_ESM.pdf/9546128)

Parasitemia

1000000  
100000  
10000  
1000  
100  
10

KH (n=15)

NG (n=23)

PH (n=37)

Country of origin

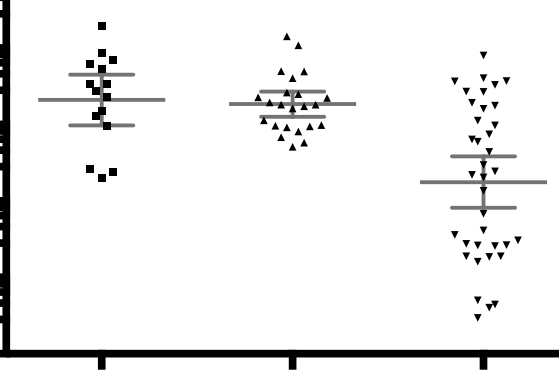

Supplement: MOESM1 [file 9546128]
